# Supplementary material for: The antibody-binding Fc gamma receptor IIIa / CD16a is N-glycosylated with high occupancy at all five sites
Source: PubMed Central journal article supplement — Curr Res Immunol. 2022 Jun 9;3:128–35. doi: 10.1016/j.crimmu.2022.05.005 (PMC9193405; doi:10.1016/j.crimmu.2022.05.005), 2022-06-09

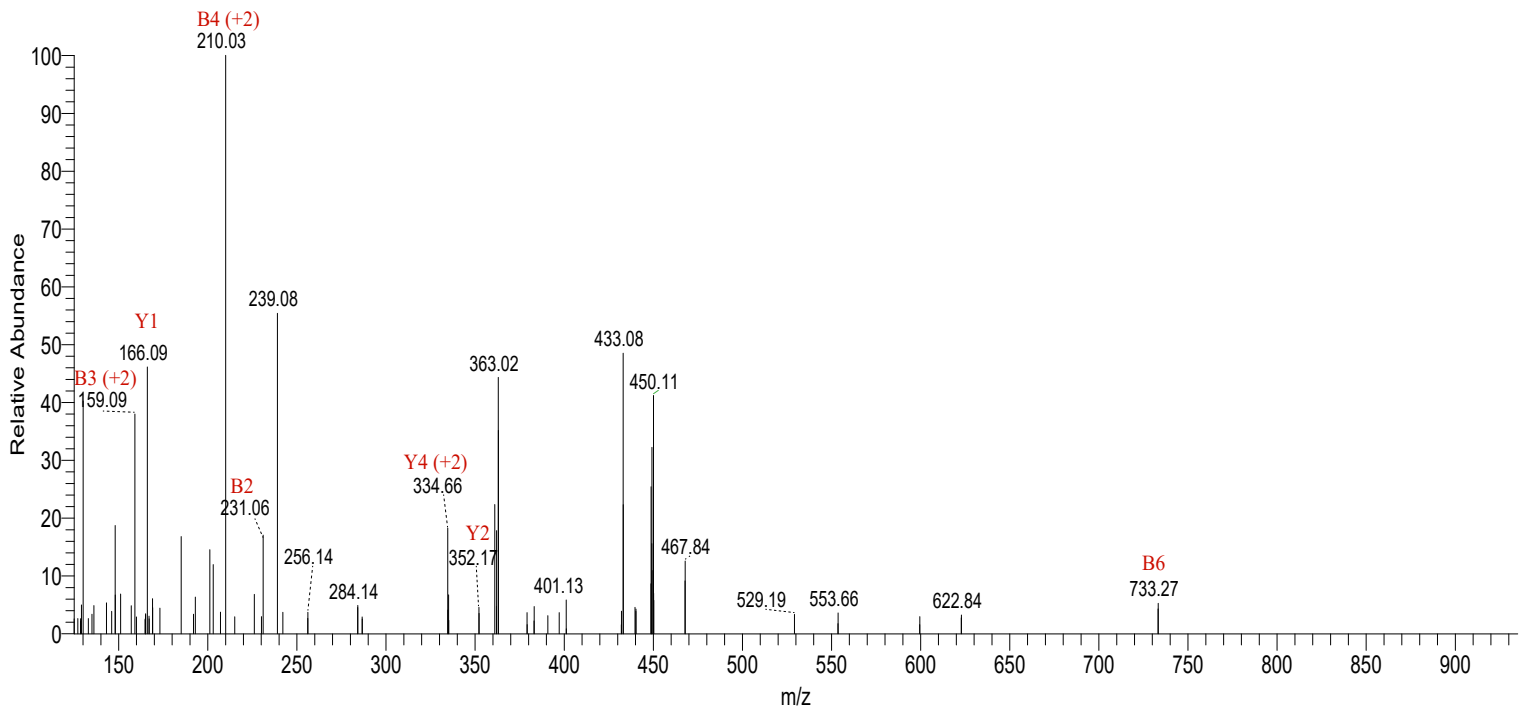

N38-4

KC(Carbaminomethyl)GAYDPEDDSTQW

Adam\_sample\_1\_1ul\_12Nov21\_V158 #9275-9451 RT: 32.89-33.42 AV: 3.59E4  
T: Average spectrum MS2 886.36 (9275-9451)

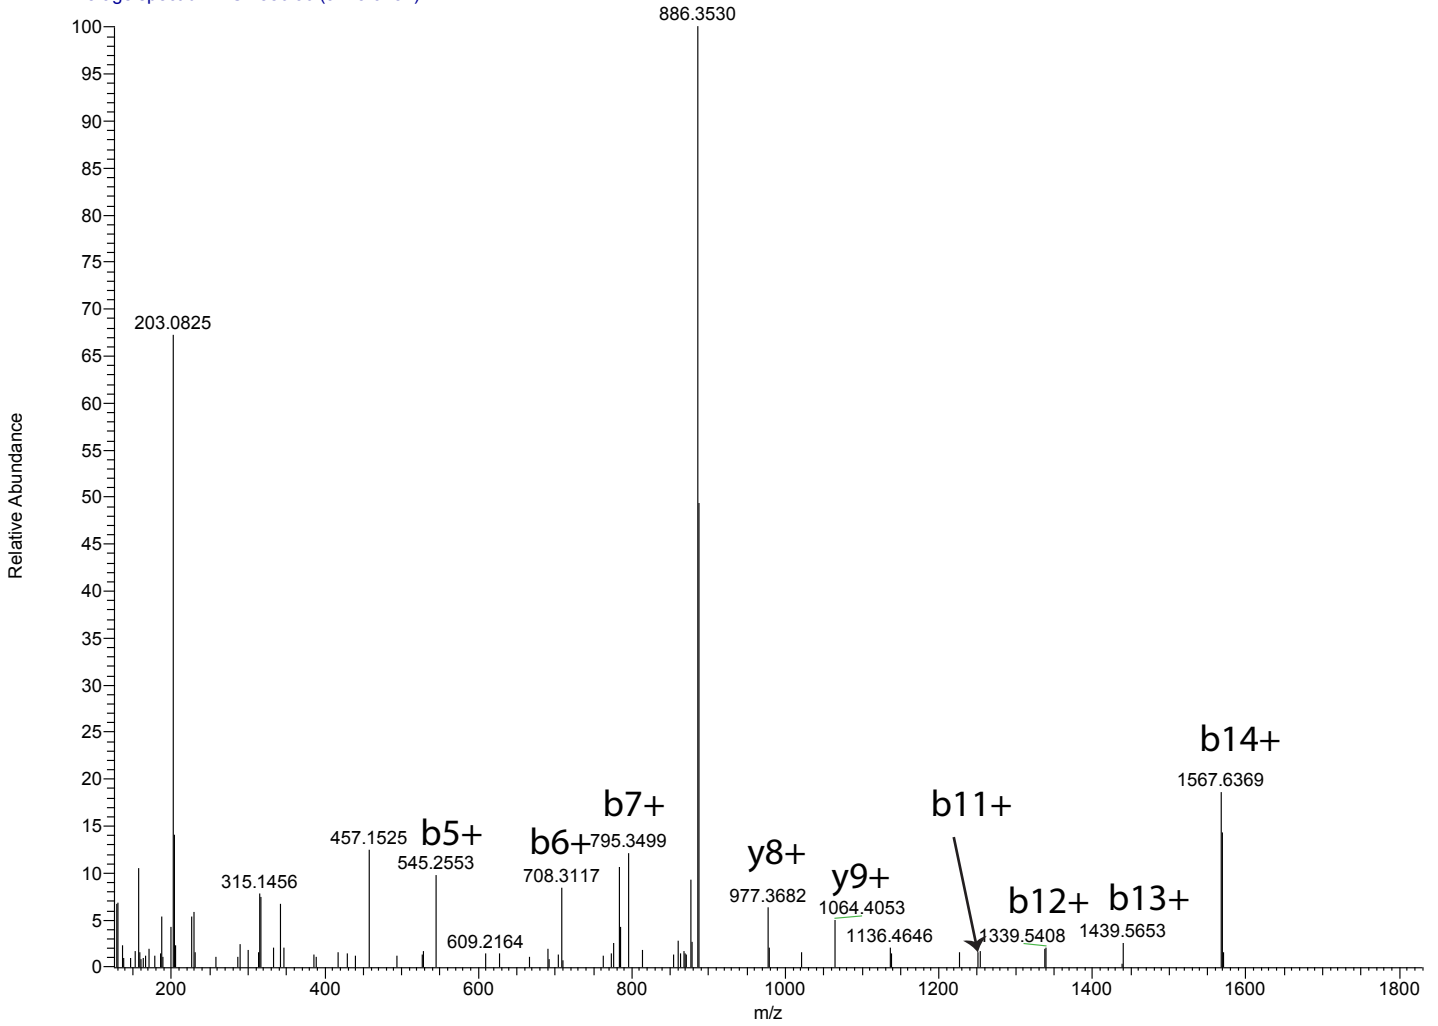

O16 Water- V158 N45  
RT: 29.59

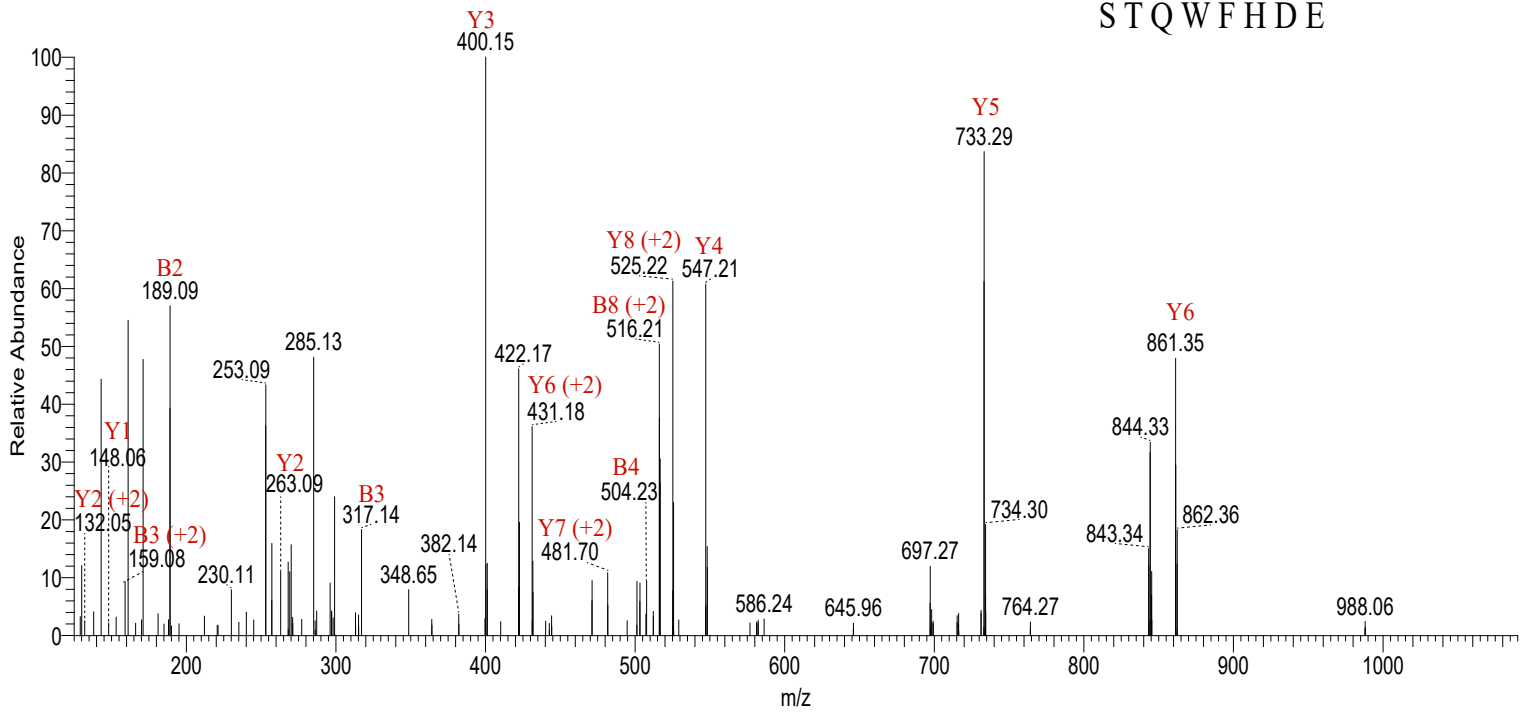

O18 Water- V158 N45  
RT: 28.48

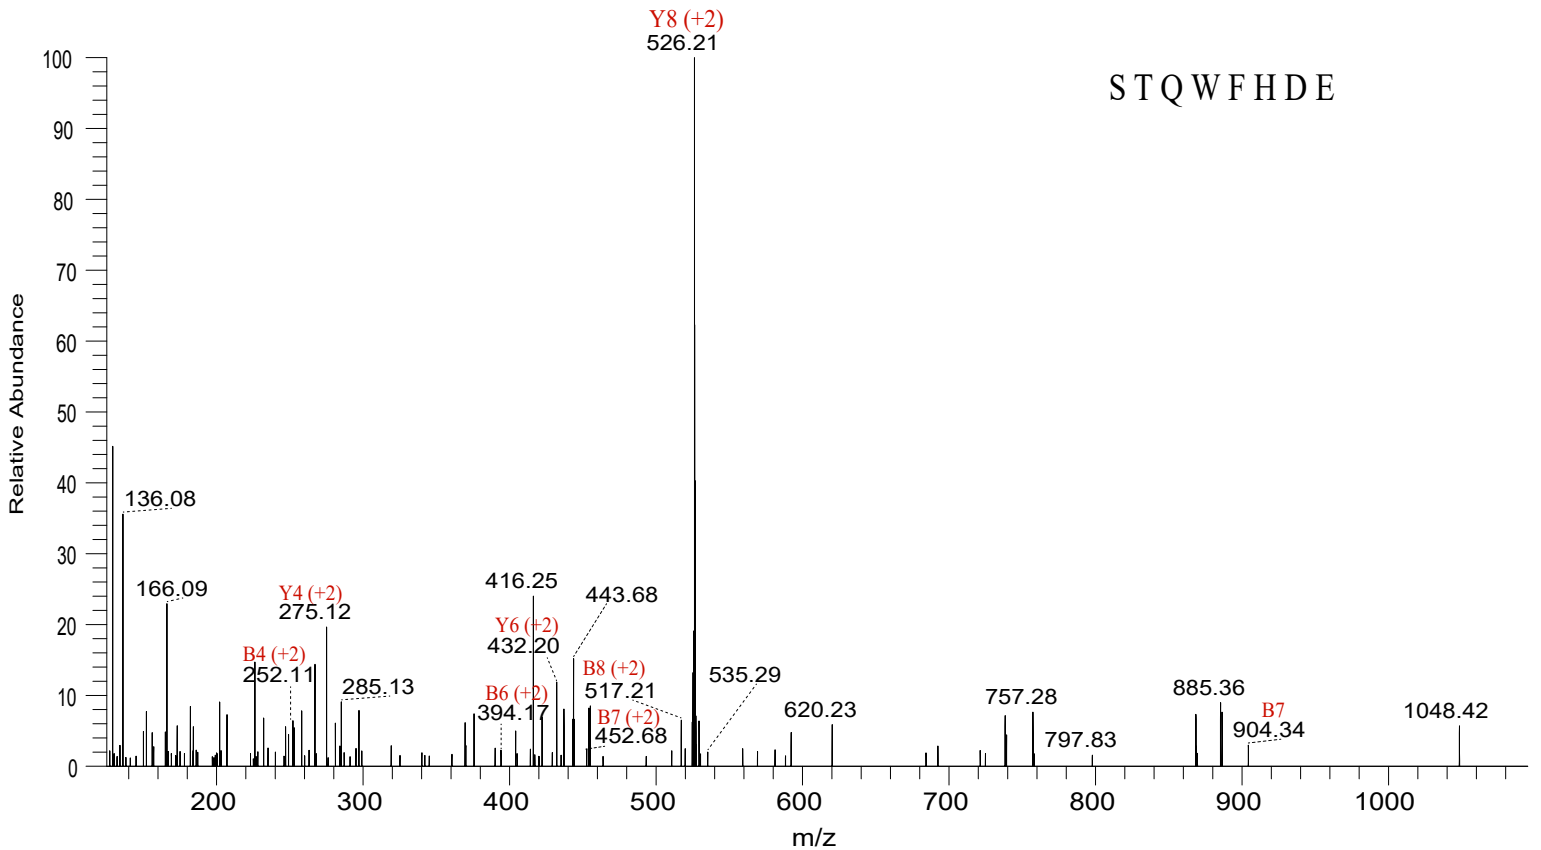

HDES L

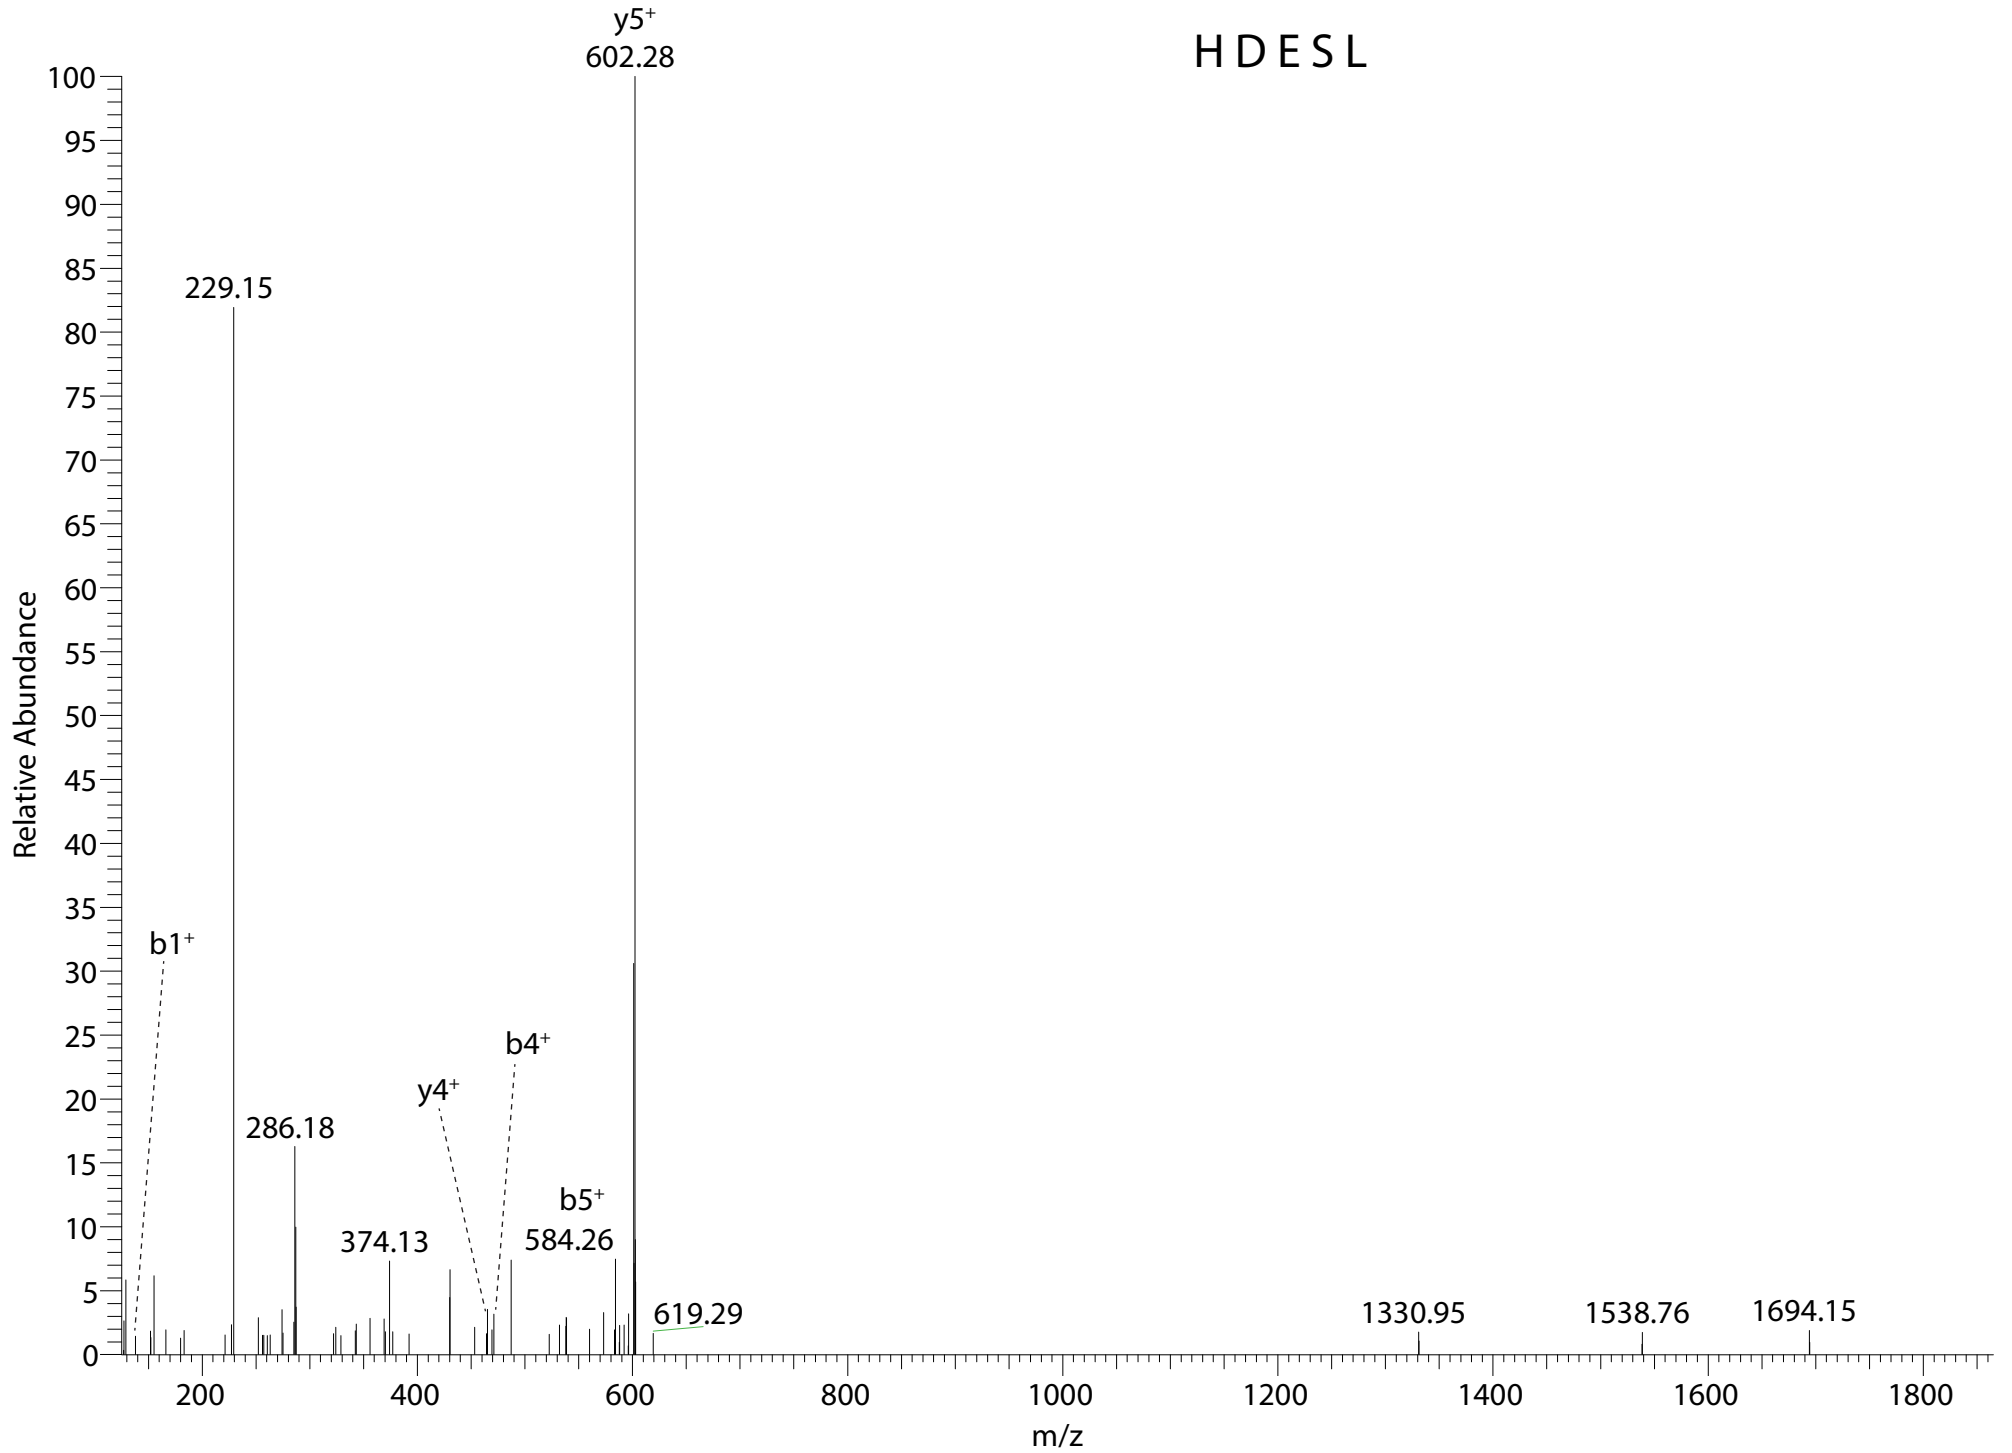

Adam\_sample\_1\_1ul\_12Nov21\_V158 #11293 RT: 38.83 AV: 1 NL: 1.1  
T: FTMS + p NSI d Full ms2 785.8561@hcd27.00 [125.0000-1625.0000]

# N45-4

## FHDESLISSQASSY

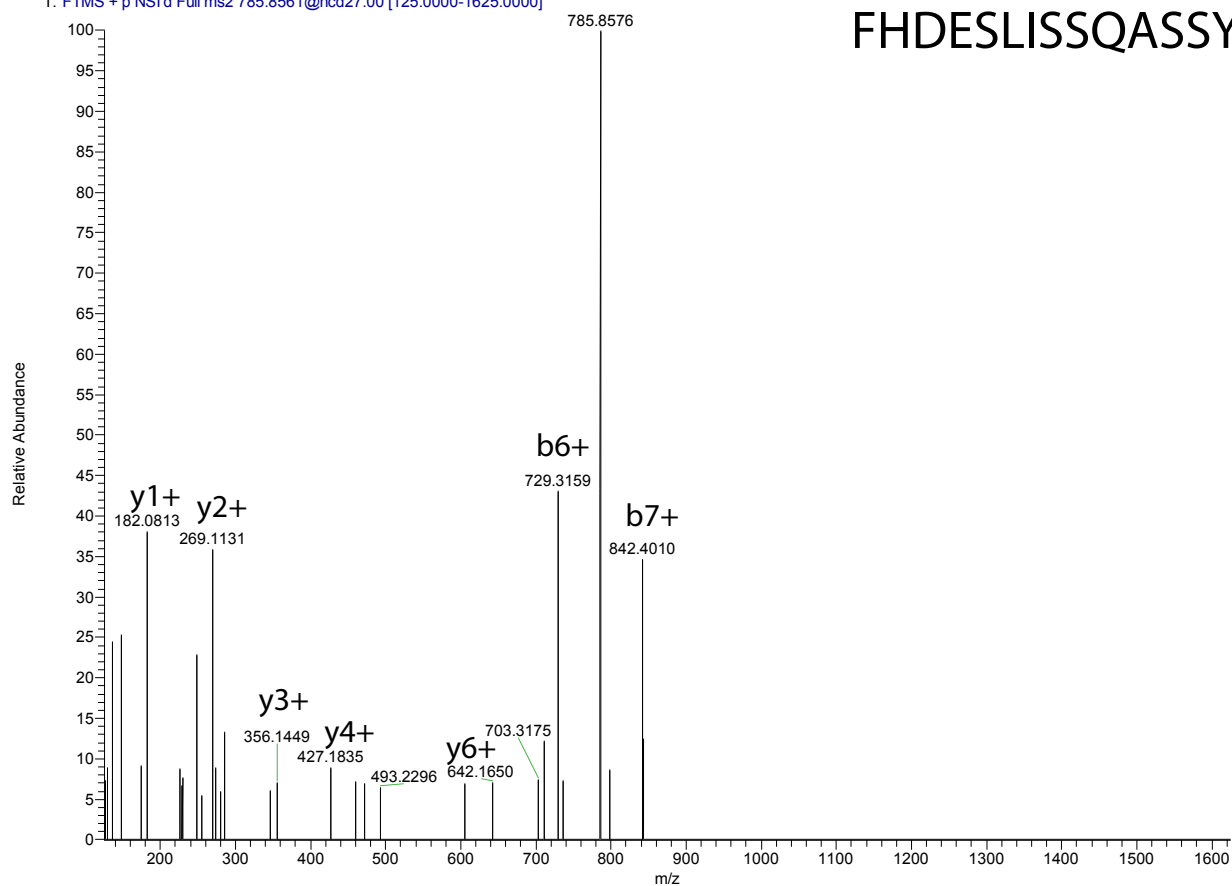

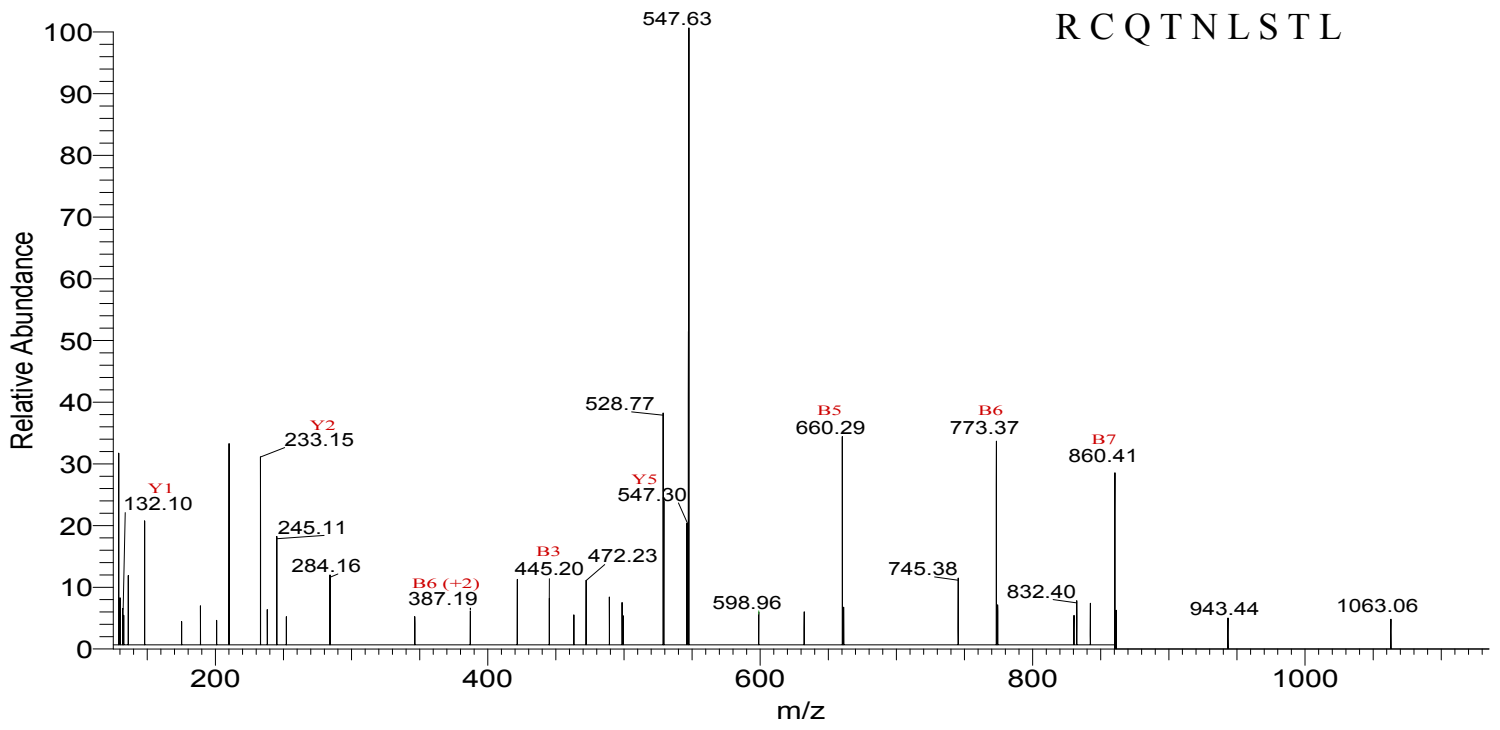

O16 Water- V158 N74  
RT: 44.68-45.70

RCQTNLSTLSDPVQLE

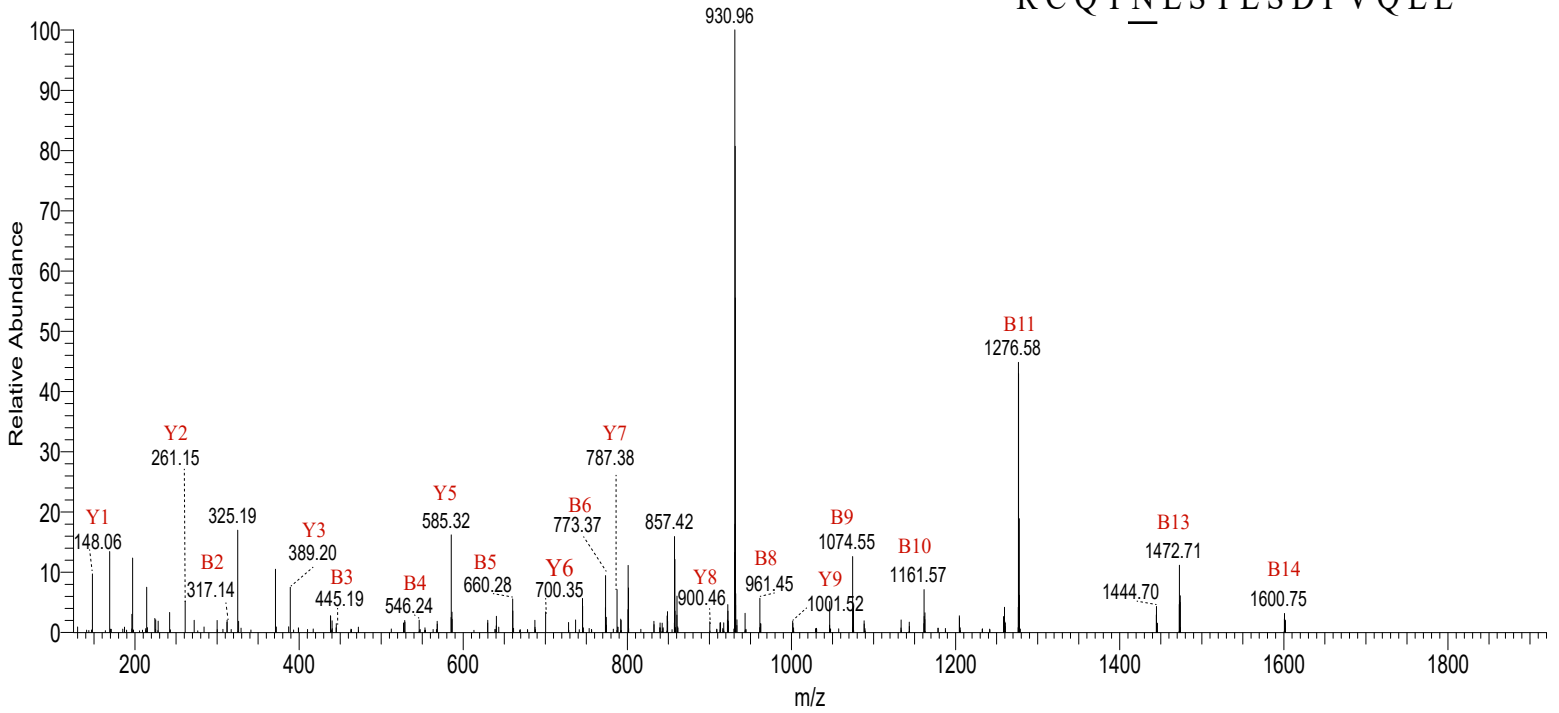

O16 Water- V158 N74  
RT: 45.19

RCQTDLSTLSDPVQLE

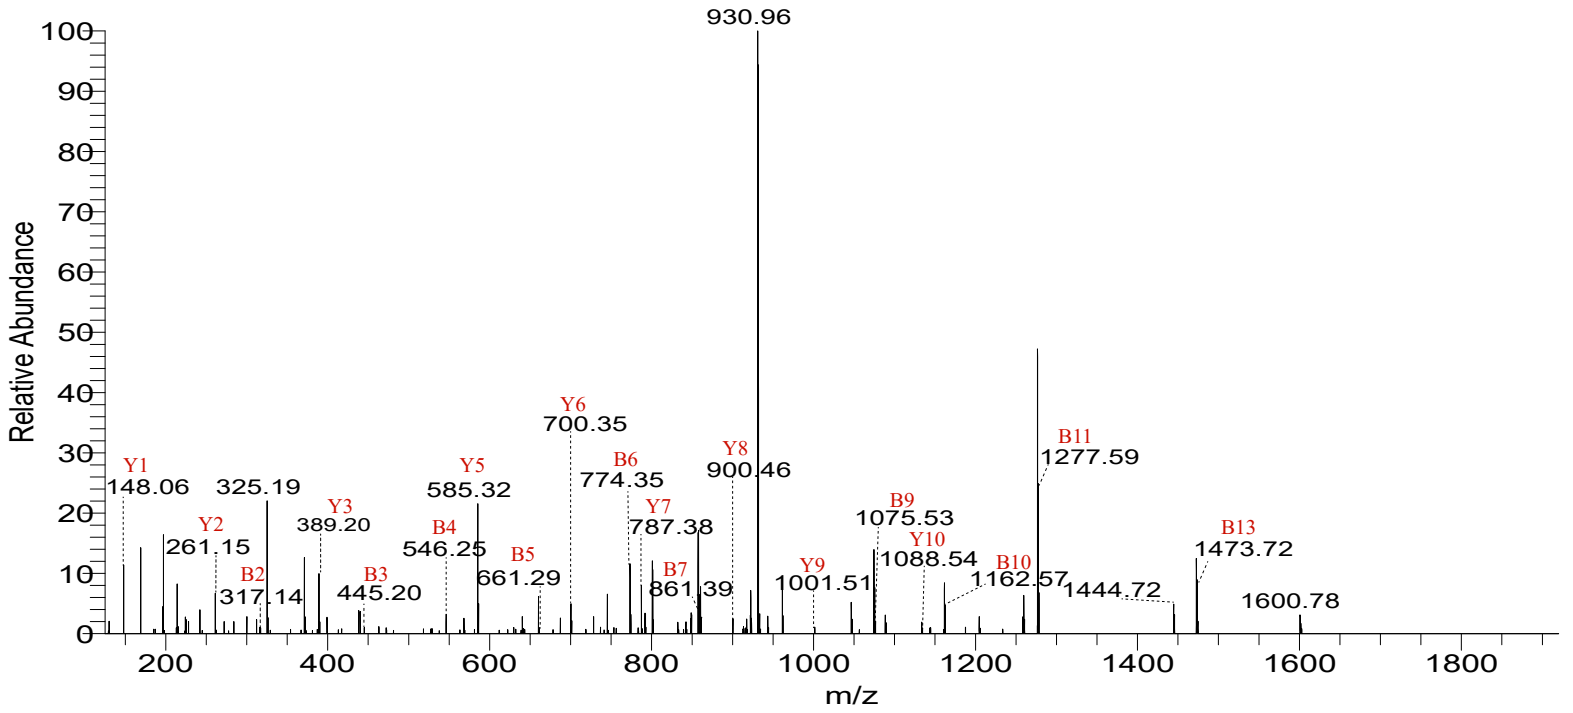

VGSKDVSSE

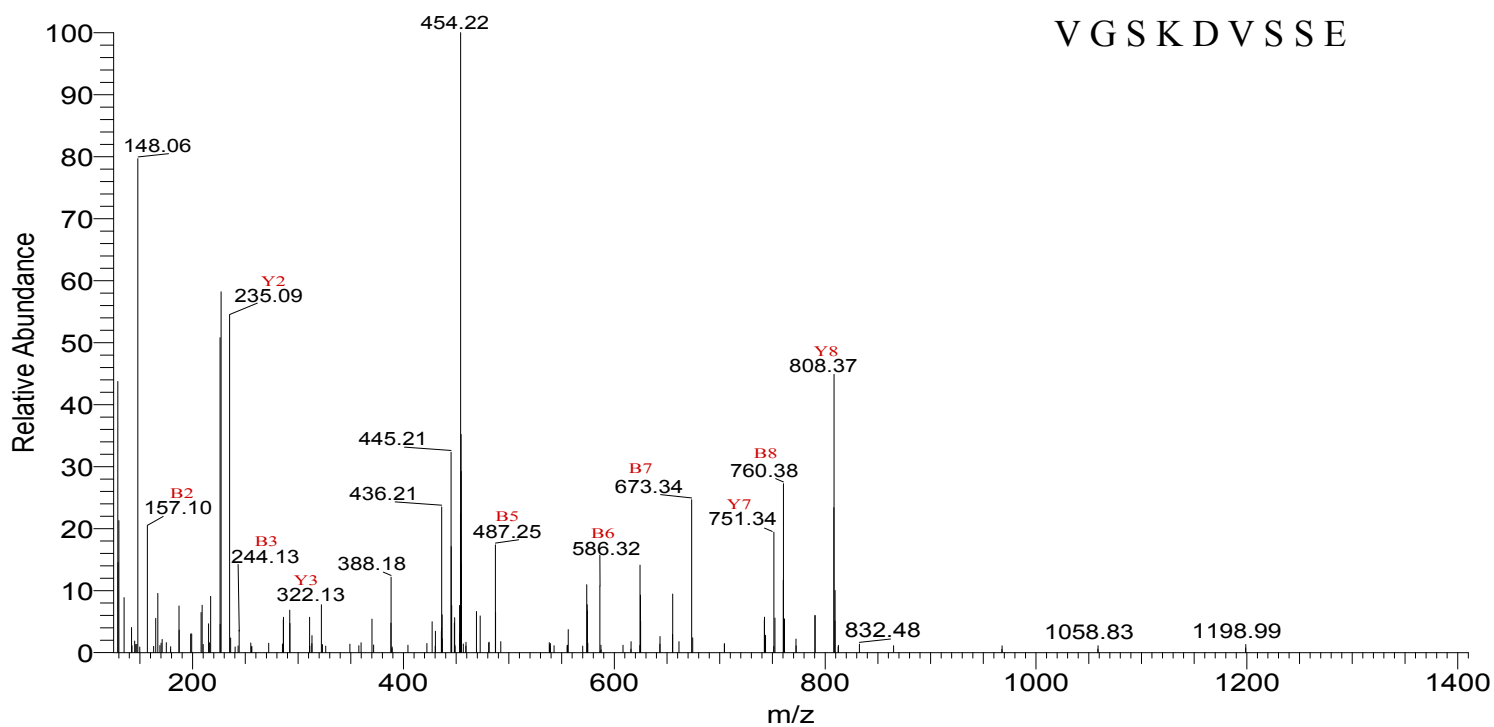



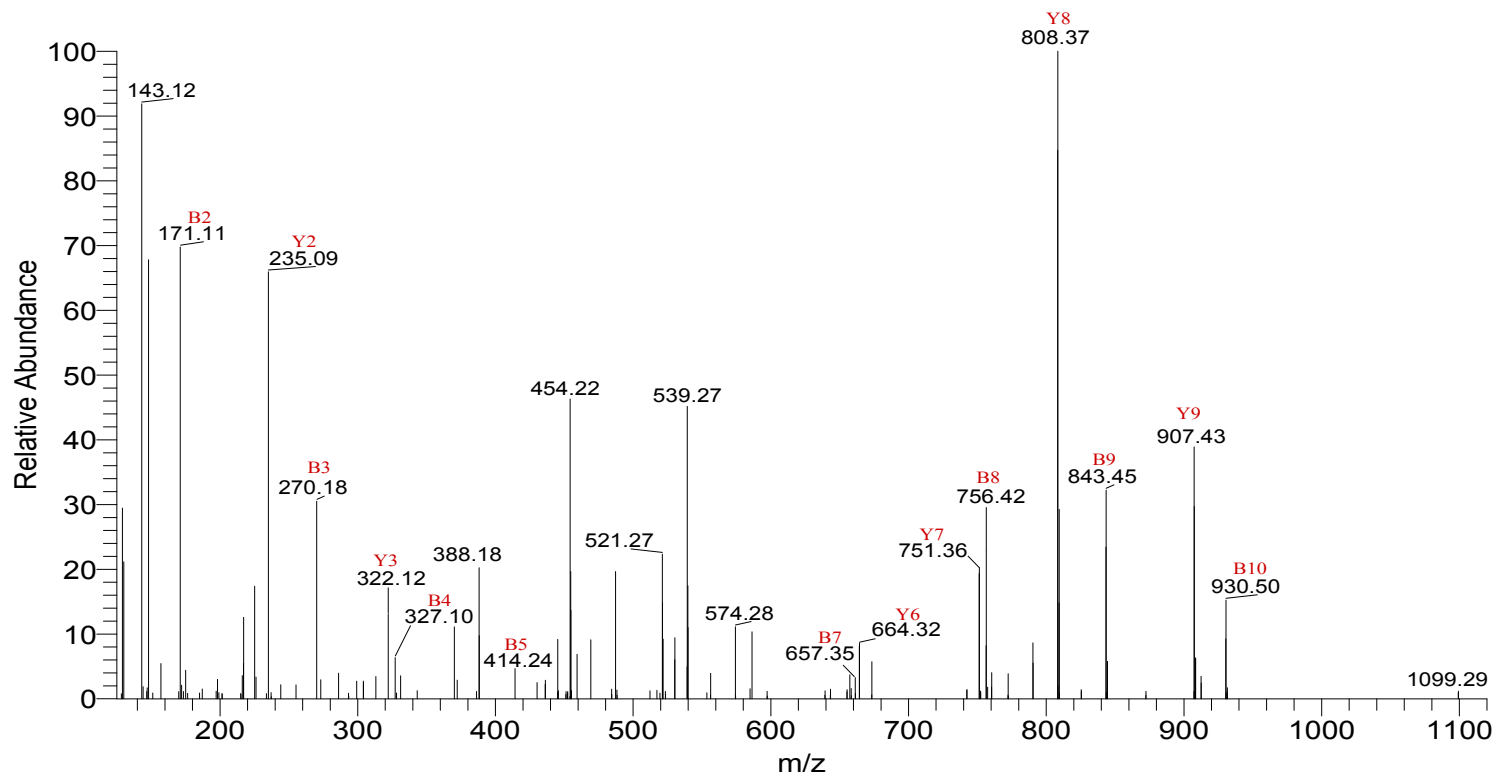

CRGLVGSKDVSSE

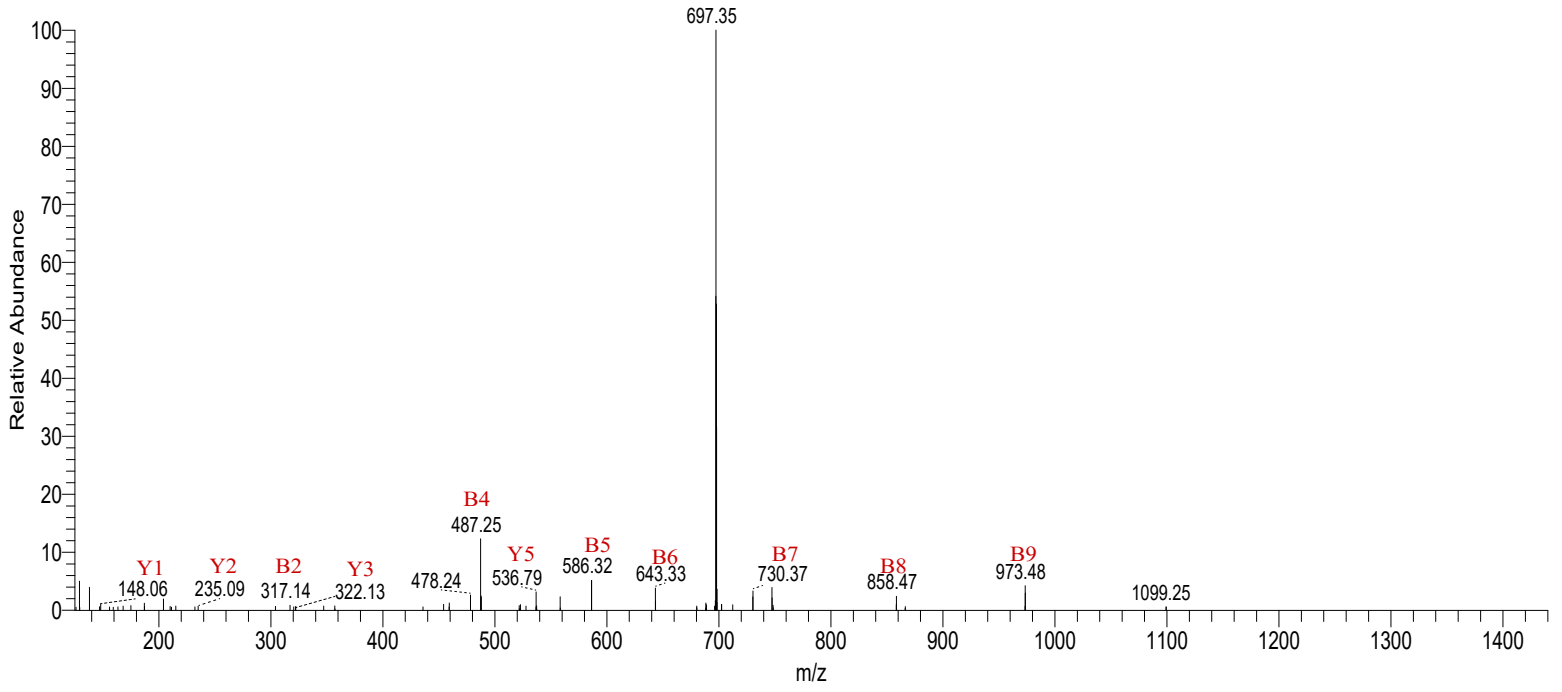

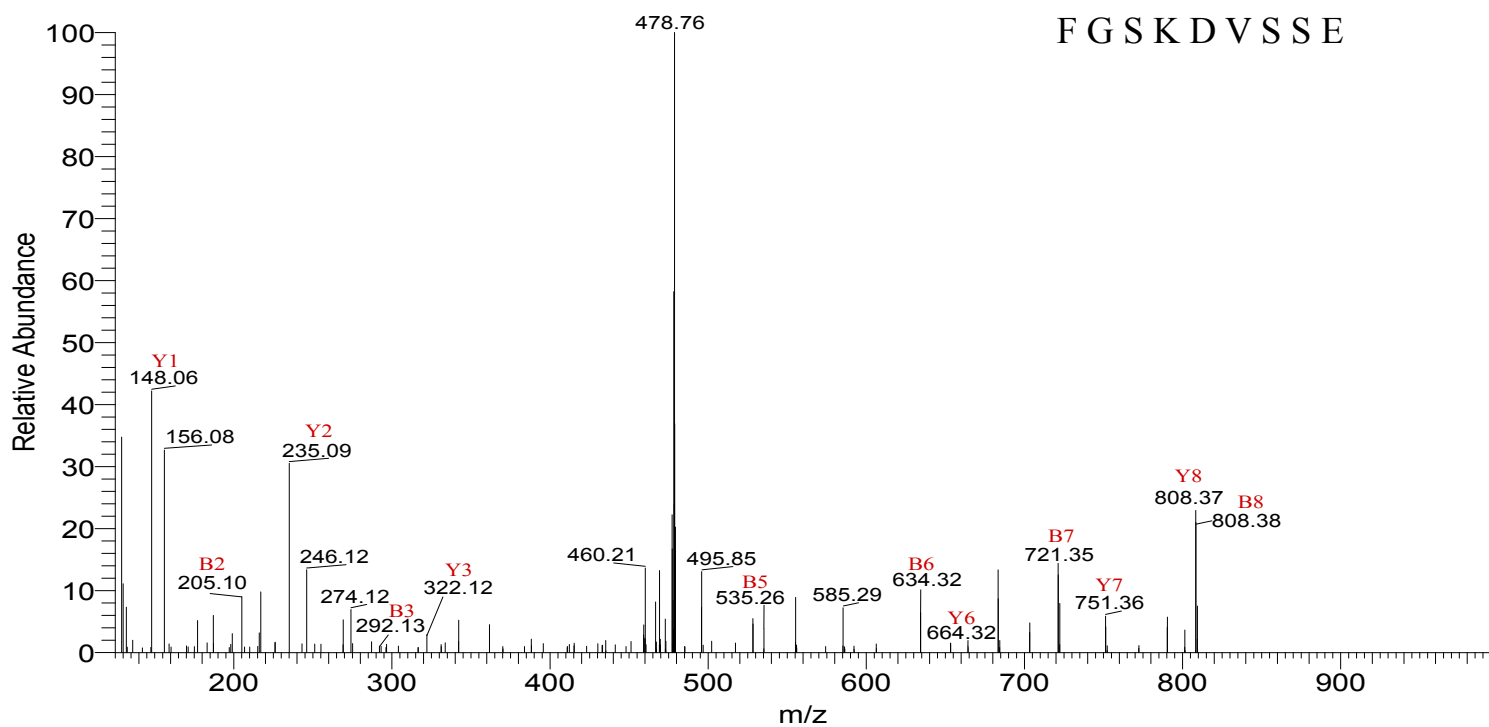

O16 Water- V158 N169  
RT: 37.02-38.56

TVDITITQG

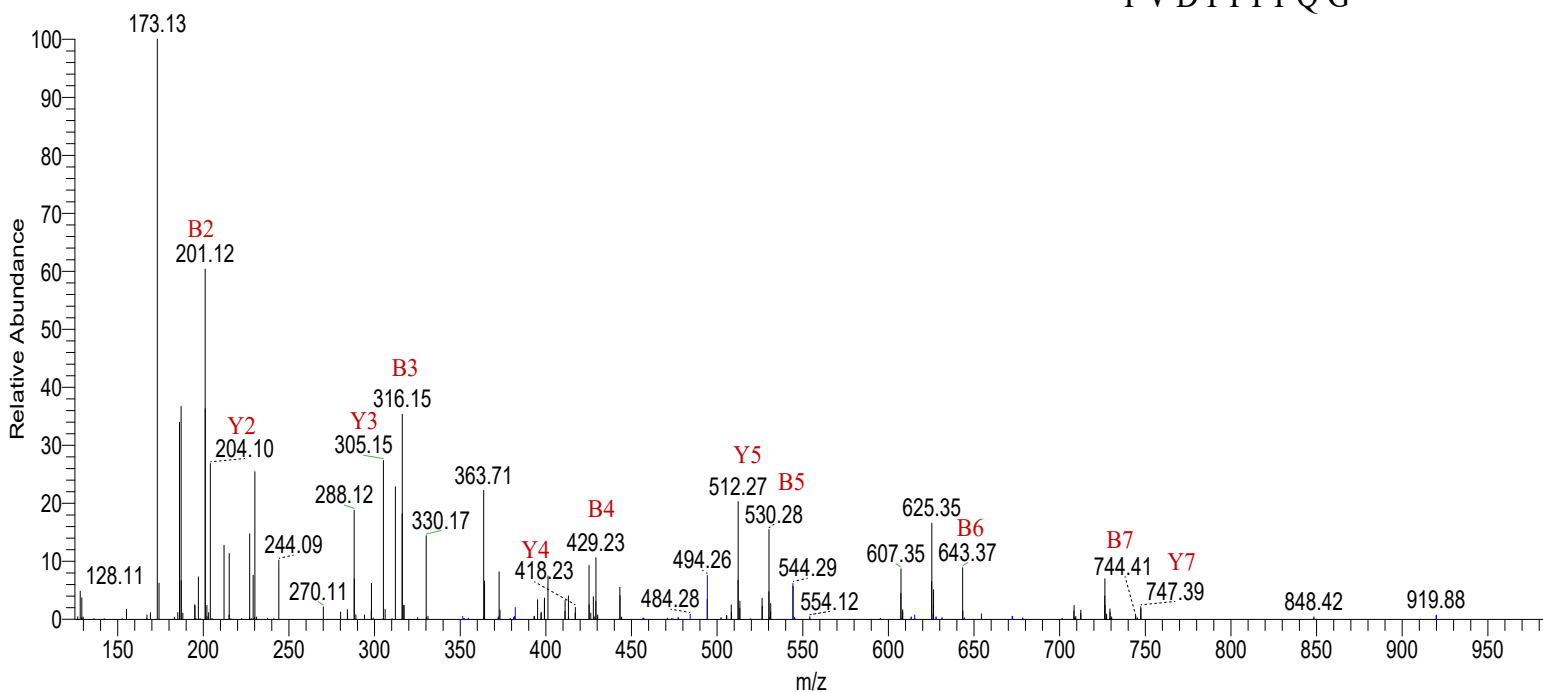

O18 Water- V158 N169  
RT: 37.97-40.02

TVDITITQG

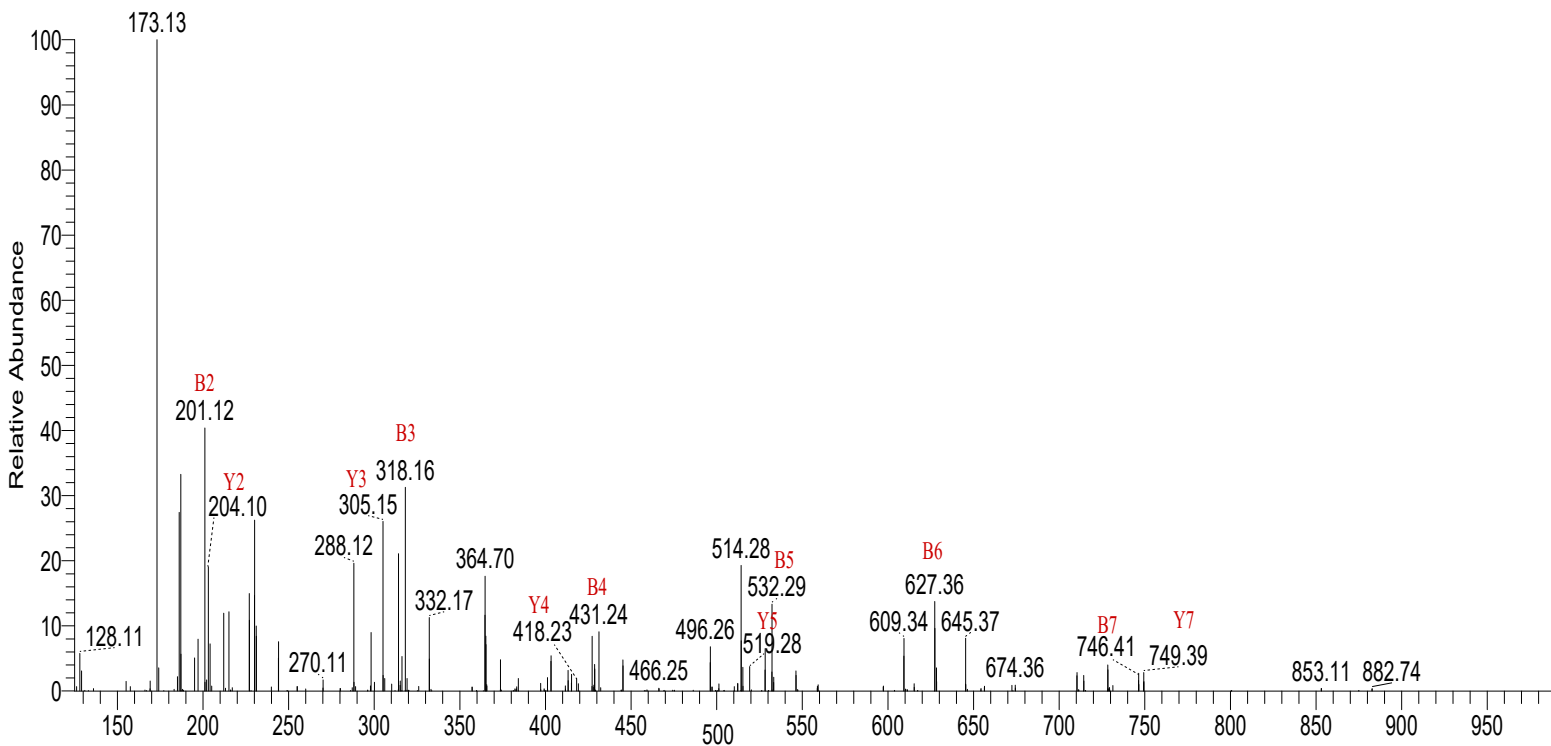

TVNIAITQG

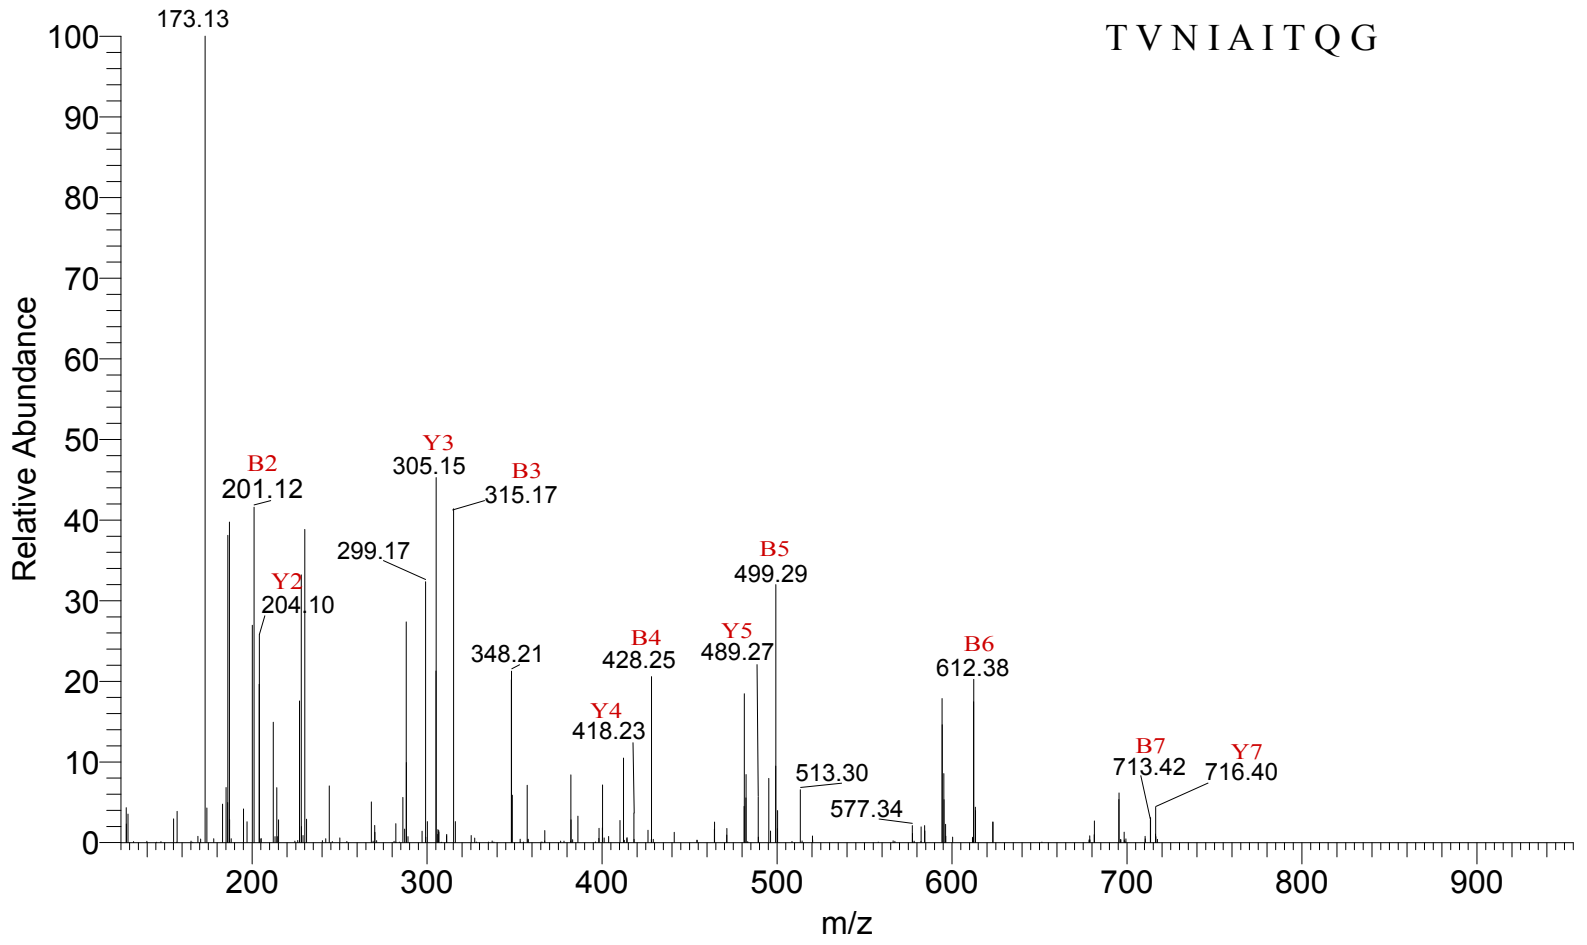

Supplement: mmc2.pdf [file mmc2.pdf]
